# Supplementary material for: Heteropoly acid-encapsulated metal–organic framework as a stable and highly efficient nanocatalyst for esterification reaction
Source: Royal Society of Chemistry journal article supplement (doi:10.1039/c9ra03209f), 2019-01-01
Supplement: c9ra03209f1.pdf [file c9ra03209f1.pdf]

## Electronic Supplementary Information

### Heteropoly acid-encapsulated metal-organic frameworks as a stable and highly efficient nanocatalyst for esterification reaction

Qiuyun Zhang <sup>[a,c]\*</sup>, Tingting Yang<sup>[a]</sup>, Xiaofang Liu<sup>[b]</sup>, Caiyan Yue<sup>[a]</sup>, Liufang Ao<sup>[a]</sup>, Taoli Deng<sup>[a]</sup>, Yutao Zhang <sup>[a,c]\*</sup>

**[a]** School of Chemistry and Chemical Engineering, Anshun University, Anshun 561000, Guizhou, China

**[b]** Food and Pharmaceutical Engineering Institute, Guiyang University, Guiyang 550005, China

**[c]** Engineering Technology Center of Control and Remediation of Soil Contamination of Provincial Science & Technology Bureau, Anshun University, Anshun, 561000, Guizhou, China

\* Correspondence: sci\_qy Zhang@126.com (Qiuyun Zhang); zyt0516@126.com (Yutao Zhang); Tel.: +86-(851)-3383-4033

**Table 1S** Variables and experimental design levels for response surface

| Variable                  | Symbol | Levels |     |     |
|---------------------------|--------|--------|-----|-----|
|                           |        | -1     | 0   | 1   |
| Reaction time / h         | $X_1$  | 3      | 4   | 5   |
| Reaction temperature / °C | $X_2$  | 150    | 160 | 170 |
| Catalyst amount / wt.%    | $X_3$  | 3      | 7   | 11  |

**Table 2S** Central composite design matrix and the responses of the dependent variables

| Standard order | $X_1$ | $X_2$ | $X_3$ | Conversion/% |           |
|----------------|-------|-------|-------|--------------|-----------|
|                |       |       |       | Experimental | Predicted |
| 1              | -1    | -1    | 0     | 63.00        | 63.74     |
| 2              | 1     | -1    | 0     | 80.90        | 82.09     |
| 3              | -1    | 1     | 0     | 78.10        | 77.24     |
| 4              | 1     | 1     | 0     | 86.20        | 85.79     |
| 5              | -1    | 0     | -1    | 66.30        | 66.93     |
| 6              | 1     | 0     | -1    | 77.00        | 77.18     |
| 7              | -1    | 0     | 1     | 71.30        | 70.78     |
| 8              | 1     | 0     | 1     | 88.40        | 87.43     |
| 9              | 0     | -1    | -1    | 74.70        | 73.49     |
| 10             | 0     | 1     | -1    | 75.40        | 75.79     |
| 11             | 0     | -1    | 1     | 74.30        | 74.24     |
| 12             | 0     | 1     | 1     | 87.60        | 89.14     |
| 13             | 0     | 0     | 0     | 77.90        | 79.81     |
| 14             | 0     | 0     | 0     | 79.20        | 79.81     |
| 15             | 0     | 0     | 0     | 81.00        | 79.81     |
| 16             | 0     | 0     | 0     | 80.20        | 79.81     |
| 17             | 0     | 0     | 0     | 81.40        | 79.81     |

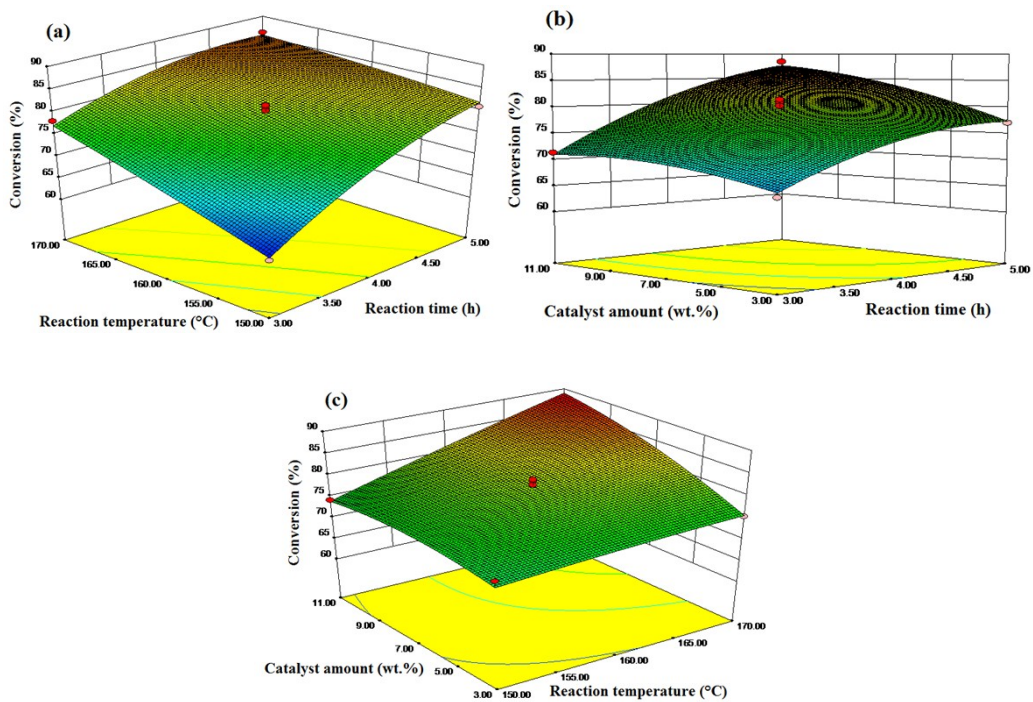

**Fig. 15.** 3-D response surface and contour plot of lauric acid conversion (a) reaction temperature and reaction time, (b) catalyst amount and reaction time, (c) catalyst amount and reaction temperature.

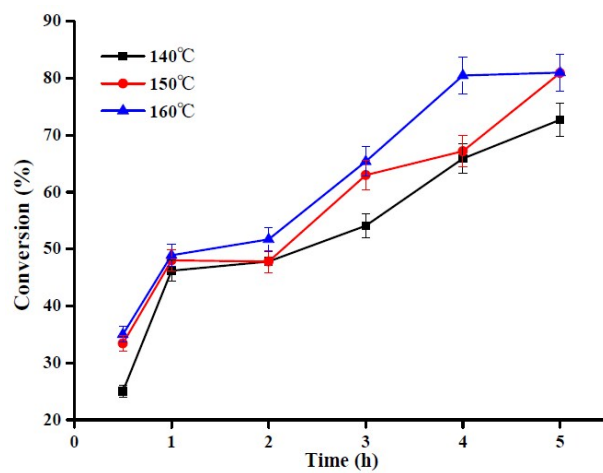

**Fig. 2S.** Esterification of lauric acid with methanol over HSiW-UiO-66 nanocatalyst at different reaction temperatures.

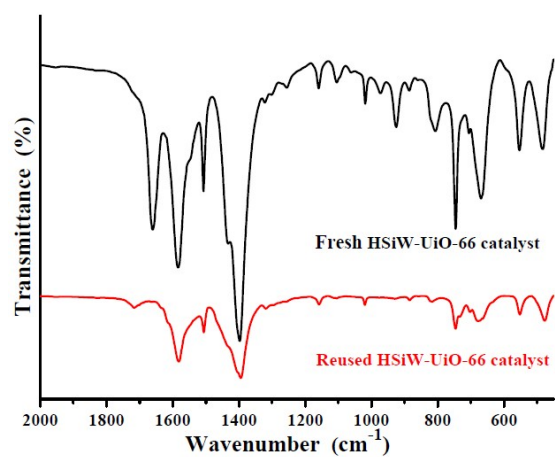

**Fig. 3S.** The comparison of FT-IR spectra of fresh HSiW-UiO-66 catalyst and reused HSiW-UiO-66 catalyst.
